# Supplementary material for: Downregulation of KRAB zinc finger proteins in 5-fluorouracil resistant colorectal cancer cells
Source: Springer Nature journal article supplement (doi:10.1186/s12885-022-09417-3), 2022-04-04
Supplement: 12885_2022_9417_MOESM2_ESM.pdf [file 12885_2022_9417_MOESM2_ESM.pdf]

# Figure S1

**A**

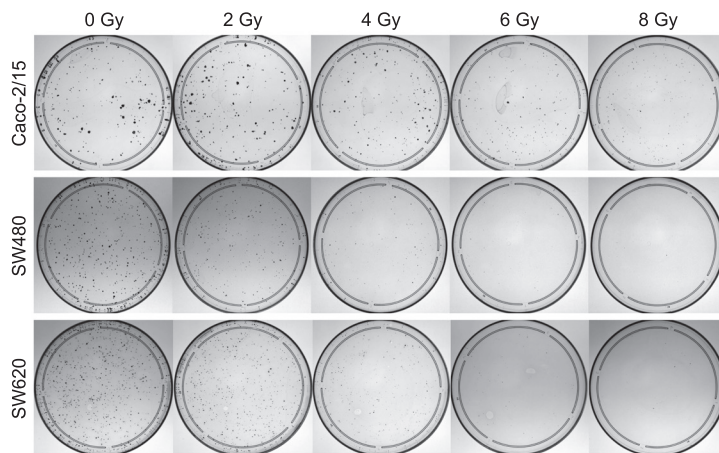

**B**

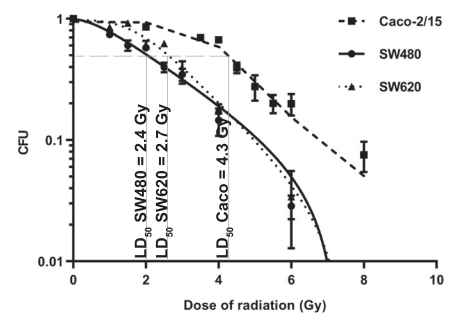

| Gy  | Caco-2/15 vs SW480 | Caco-2/15 vs SW620 | SW480 vs SW620 |
|-----|--------------------|--------------------|----------------|
| 1   | -                  | -                  | 0.125          |
| 1.5 | -                  | -                  | 5.8 e-3        |
| 2   | 6.2 e-4            | 1.2 e-3            | 0.505          |
| 2.5 | -                  | -                  | 8.3 e-4        |
| 3   | -                  | -                  | 0.796          |
| 4   | 8.3 e-4            | 2.3 e-4            | 0.504          |
| 6   | 1.2 e-4            | 4.0 e-3            | 0.763          |
| 8   | 2.3 e-3            | 6.8 e-3            | 0.483          |

**C**

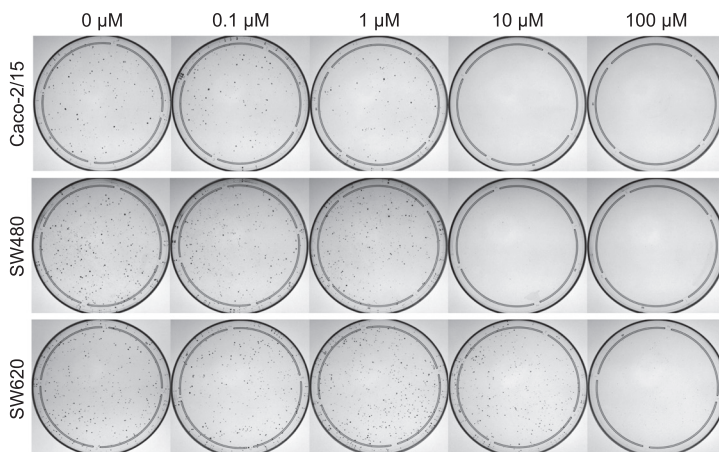

**D**

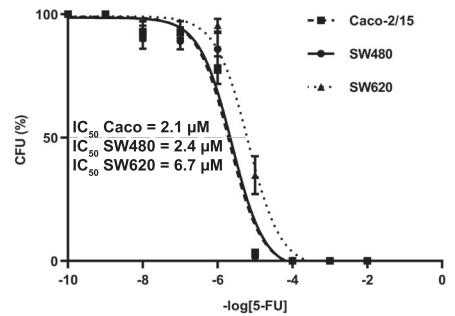

| [5-FU] | Caco-2/15 vs SW480 | Caco-2/15 vs SW620 | SW480 vs SW620 |
|--------|--------------------|--------------------|----------------|
| 10 nM  | 0.648              | 0.748              | 0.481          |
| 100 nM | 0.384              | 0.647              | 0.238          |
| 1 μM   | 0.340              | 1.5 e-2            | 0.222          |
| 10 μM  | 0.380              | 1.2 e-4            | 4.4 e-5        |
| 100 μM | 0.160              | -                  | 0.274          |
