# Supplementary material for: Downregulation of KRAB zinc finger proteins in 5-fluorouracil resistant colorectal cancer cells
Source: Springer Nature journal article supplement (doi:10.1186/s12885-022-09417-3), 2022-04-04

Figure S2

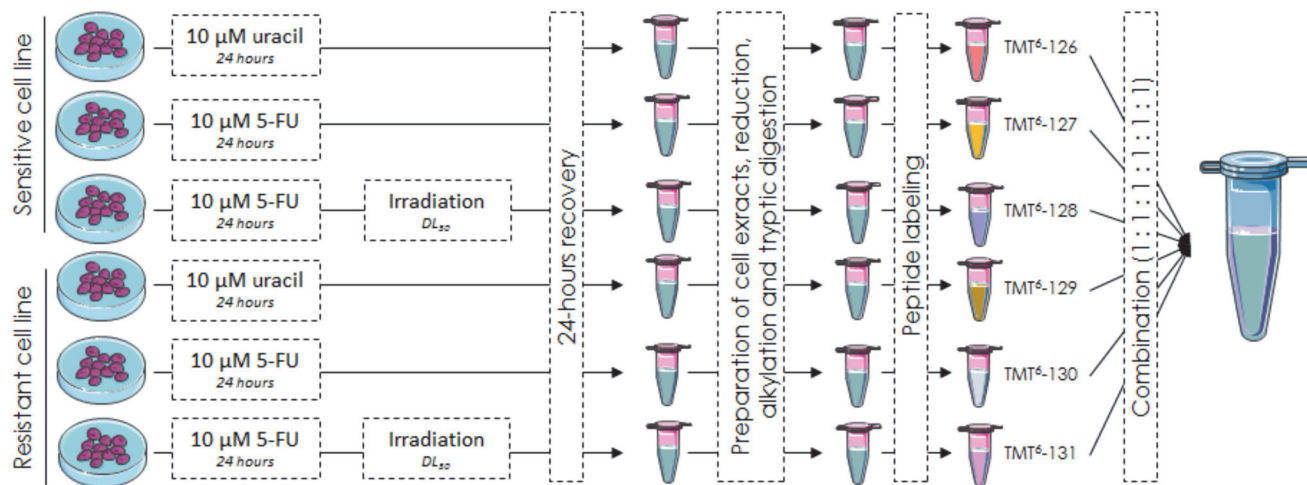

Supplement: 12885_2022_9417_MOESM3_ESM.pdf [file 12885_2022_9417_MOESM3_ESM.pdf]
